# Supplementary material
Source: PubMed Central journal article supplement (PMC1047090)
Supplement: pnas_102_8_2850__2.pdf [file pnas_102_8_2850__2.pdf]

**Table 1. The highest ranked 240 oligonucleotide sequences utilized in ACESCAN**

| Upstream |        | Downstream |             |      |             | Aligned upstream |        | Aligned |        | Aligned downstream |       |      |        |
|----------|--------|------------|-------------|------|-------------|------------------|--------|---------|--------|--------------------|-------|------|--------|
| Rank     | intron | Rank       | Exon 5' end | Rank | Exon 3' end | Rank             | intron | Rank    | intron | Rank               | exon  | Rank | intron |
| 12       | tftc   | 11         | ctcc        | 15   | tccc        | 27               | tgcac  | 10      | tgcac  | 21                 | tgtag | 2    | gcatg  |
| 16       | cttt   | 23         | tccc        | 25   | ctcc        | 80               | gcatg  | 20      | cgct   | 22                 | gtagt | 6    | tgcat  |
| 19       | gccc   | 30         | ctcc        | 39   | ccctc       | 109              | tgca   | 28      | gcac   | 26                 | actag | 7    | catg   |
| 47       | tttt   | 46         | ctccc       | 41   | caatc       | 111              | tccg   | 34      | ccgc   | 31                 | tagaa | 13   | gcat   |
| 50       | ttcc   | 61         | ccctc       | 51   | ctccc       | 136              | cttt   | 37      | gcatg  | 33                 | ctccc | 17   | catgc  |
| 63       | ttgc   | 94         | caatc       | 56   | ctcc        | 144              | cgca   | 38      | ctac   | 35                 | cgaag | 18   | tgca   |
| 65       | tctct  | 119        | tccct       | 67   | ccct        | 165              | tggtc  | 43      | ttgc   | 45                 | cccgc | 24   | ttgc   |
| 73       | tctc   | 125        | ctcc        | 74   | aaag        | 168              | cattg  | 48      | cgtc   | 53                 | ctacg | 29   | acta   |
| 75       | cgct   | 135        | cccc        | 96   | tccct       | 171              | tgccc  | 49      | gtcg   | 55                 | taacg | 58   | atgca  |
| 78       | ccgc   | 167        | acata       | 110  | gtccc       | 185              | tgccg  | 57      | cgggg  | 64                 | taaac | 60   | ctaa   |
| 84       | tccg   | 180        | cgggc       | 113  | tccct       | 201              | ccgc   | 59      | acta   | 68                 | tctag | 76   | ctaac  |
| 97       | tgctc  | 196        | aaag        | 118  | aggg        | 213              | ctaac  | 72      | caat   | 69                 | tagtg | 77   | gtttg  |
| 99       | ttgt   | 206        | aggg        | 140  | ctcc        | 217              | gtttg  | 81      | cggg   | 79                 | taacc | 91   | gccc   |
| 102      | ctctt  | 207        | cccc        | 152  | teccc       | 219              | gacag  | 82      | acgt   | 89                 | cggcc | 93   | actaa  |
| 117      | ctttc  | 215        | cccgc       | 199  | gaaa        | 184              | ggaca  | 83      | cacg   | 95                 | cgcgc | 122  | ccaa   |
| 124      | gccc   | 220        | taacc       | 203  | gaaag       | 194              | atgat  | 86      | atcc   | 101                | taggc | 123  | acta   |
| 126      | tcttt  | 222        | tctct       | 211  | cccgc       | 198              | agag   | 87      | acact  | 103                | cacga | 139  | cactt  |
| 132      | tctt   | 223        | caggg       | 225  | tagg        | 141              | aggg   | 90      | ttaac  | 106                | cgta  | 166  | cggt   |
| 133      | cgcgc  | 212        | tgat        | 234  | cgaa        | 98               | caggg  | 100     | actac  | 128                | cccta | 175  | caat   |
| 134      | tcttt  | 230        | cgtgg       | 236  | aaaag       | 85               | gagg   | 105     | cctat  | 129                | gtcgt | 176  | caaat  |
| 146      | tctc   | 162        | gacc        | 238  | tgaaa       | 88               | cagg   | 107     | gccg   | 130                | ttacg | 205  | catgg  |
| 148      | ccct   | 114        | ctgg        | 172  | catca       | 42               | tgag   | 115     | caac   | 137                | taggg | 221  | atgc   |
| 149      | tgcac  |            |             | 195  | gtac        | 32               | gtgag  | 120     | cgtt   | 138                | ctccg | 228  | cact   |
| 151      | tccc   |            |             | 155  | tgccc       |                  |        | 127     | cgca   | 142                | cgccc | 150  | agag   |
| 159      | ctttt  |            |             | 70   | ctgg        |                  |        | 145     | tccat  | 143                | tacga | 92   | taagt  |
| 169      | ctct   |            |             |      |             |                  |        | 154     | catat  | 153                | tctct | 40   | taaga  |
| 182      | ttctc  |            |             |      |             |                  |        | 160     | tgcc   | 158                | agtag | 36   | gagt   |
| 187      | ctac   |            |             |      |             |                  |        | 161     | ggcc   | 163                | ccccc | 14   | tgagt  |
| 200      | tttg   |            |             |      |             |                  |        | 178     | cccg   | 164                | agtta | 9    | taag   |
| 204      | tttgc  |            |             |      |             |                  |        | 186     | ccga   | 170                | ttaat | 8    | gtaa   |
| 224      | ttttt  |            |             |      |             |                  |        | 188     | cgat   | 173                | tagga | 5    | gtga   |
| 232      | gtttc  |            |             |      |             |                  |        | 190     | catc   | 174                | actga | 4    | tgag   |
| 208      | ggac   |            |             |      |             |                  |        | 214     | ctatt  | 177                | tcttt | 3    | gtaag  |
| 210      | gagg   |            |             |      |             |                  |        | 226     | cgga   | 183                | gaaag | 1    | gtgag  |
| 227      | agcc   |            |             |      |             |                  |        | 240     | tccc   | 189                | ctccc |      |        |
| 229      | gacag  |            |             |      |             |                  |        | 237     | cctg   | 191                | taatt |      |        |
| 179      | ggctg  |            |             |      |             |                  |        | 239     | ccag   | 193                | caatc |      |        |
| 181      | cagg   |            |             |      |             |                  |        | 192     | aaaa   | 197                | ccgct |      |        |
| 156      | tgag   |            |             |      |             |                  |        | 147     | cagg   | 209                | cccc  |      |        |
| 121      | ggaca  |            |             |      |             |                  |        | 157     | gagg   | 216                | ggcgg |      |        |
| 131      | gagc   |            |             |      |             |                  |        | 116     | gtgag  | 218                | ctagc |      |        |
| 62       | tggg   |            |             |      |             |                  |        | 104     | ctgg   | 231                | ctctc |      |        |
| 44       | ggag   |            |             |      |             |                  |        | 66      | tgag   | 233                | ccgaa |      |        |
|          |        |            |             |      |             |                  |        |         |        | 235                | atcaa |      |        |
|          |        |            |             |      |             |                  |        |         |        | 202                | tgag  |      |        |
|          |        |            |             |      |             |                  |        |         |        | 108                | catca |      |        |
|          |        |            |             |      |             |                  |        |         |        | 112                | acctg |      |        |
|          |        |            |             |      |             |                  |        |         |        | 71                 | ctgga |      |        |
|          |        |            |             |      |             |                  |        |         |        | 52                 | gctgg |      |        |
|          |        |            |             |      |             |                  |        |         |        | 54                 | ctgce |      |        |

Oligonucleotide features are ranked from most significantly differentially represented between  $S_{H,M}$  and  $S_{h,m}$  (1) to least significantly differentially represented ( $n = 240$ ) by the  $\chi^2$  statistic with Yates correction factor. Within each column, features are ordered by the level of enrichment in  $S_{H,M}$  versus  $S_{h,m}$  and represented according to pertinent sequence regions. Features in black and red represent oligonucleotides enriched in  $S_{H,M}$  and  $S_{h,m}$ , respectively.

1. Altschul, S. F., Gish, W., Miller, W., Myers, E. W. & Lipman, D. J. (1990) *J. Mol. Biol.* **215**, 403-10.
