# Supplementary material
Source: PubMed Central journal article supplement (PMC1047090)
Supplement: pnas_102_8_2850__4.pdf [file pnas_102_8_2850__4.pdf]

**A**

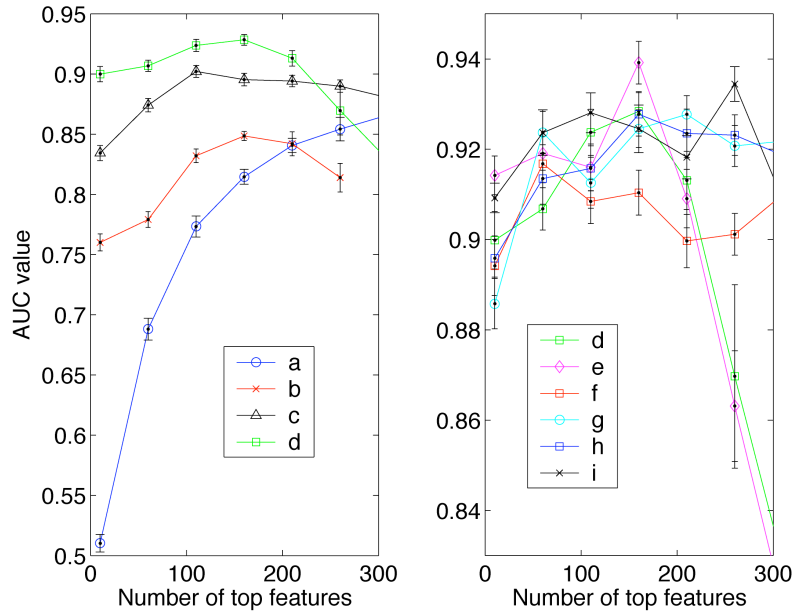

**B**

| Model index                          | a | b | c | d | e | f | g | h | i |
|--------------------------------------|---|---|---|---|---|---|---|---|---|
| Core features                        | x | ✓ | ✓ | ✓ | ✓ | ✓ | ✓ | ✓ | ✓ |
| Upstream intron alignment score      | x | x | x | ✓ | ✓ | ✓ | x | ✓ | ✓ |
| Downstream intron alignment score    | x | x | x | ✓ | ✓ | ✓ | ✓ | x | ✓ |
| Exon alignment score                 | x | x | ✓ | x | ✓ | x | ✓ | ✓ | ✓ |
| Upstream intron alignment features   | x | x | x | x | x | ✓ | x | ✓ | ✓ |
| Downstream intron alignment features | x | x | x | x | x | ✓ | ✓ | x | ✓ |
| Exon alignment features              | x | x | ✓ | x | x | x | ✓ | ✓ | ✓ |
| Flanking intron features             | ✓ | ✓ | x | ✓ | ✓ | x | x | x | ✓ |
| Exon features                        | ✓ | ✓ | x | ✓ | ✓ | x | x | x | ✓ |
