# Supplementary material
Source: PubMed Central journal article supplement (PMC1047090)

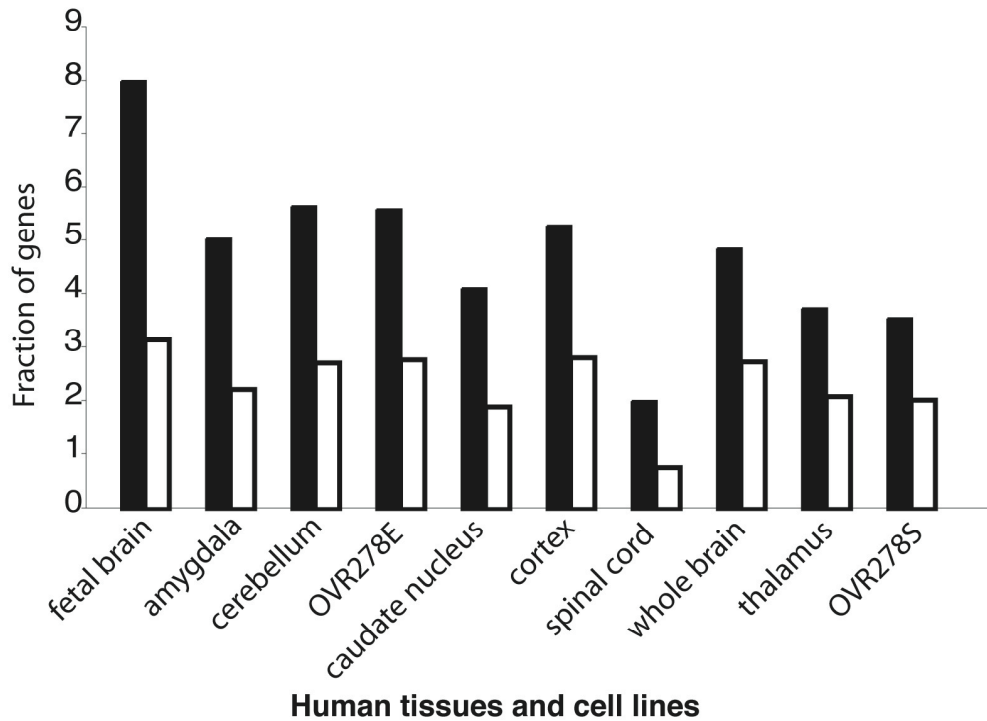

Supplement: pnas_102_8_2850__10.pdf [file pnas_102_8_2850__10.pdf]

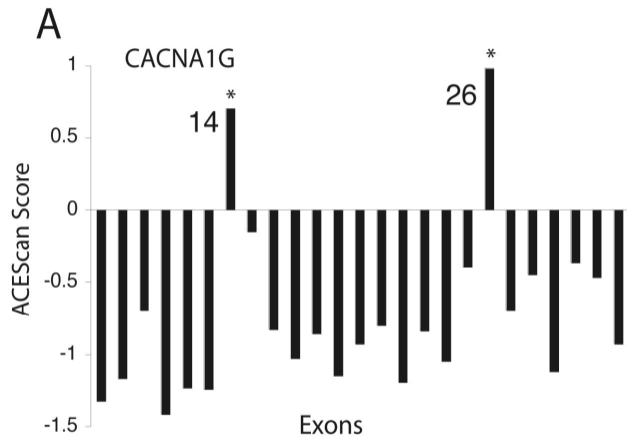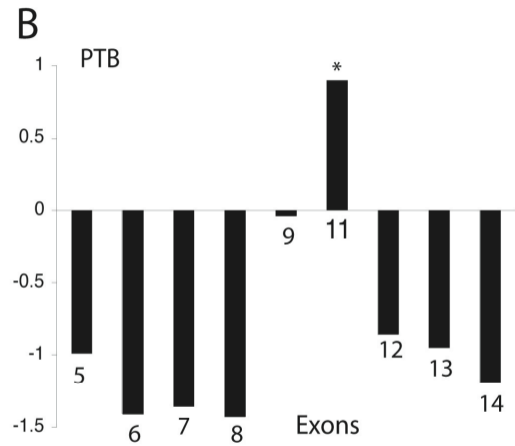

Supplement: pnas_102_8_2850__7.pdf [file pnas_102_8_2850__7.pdf]

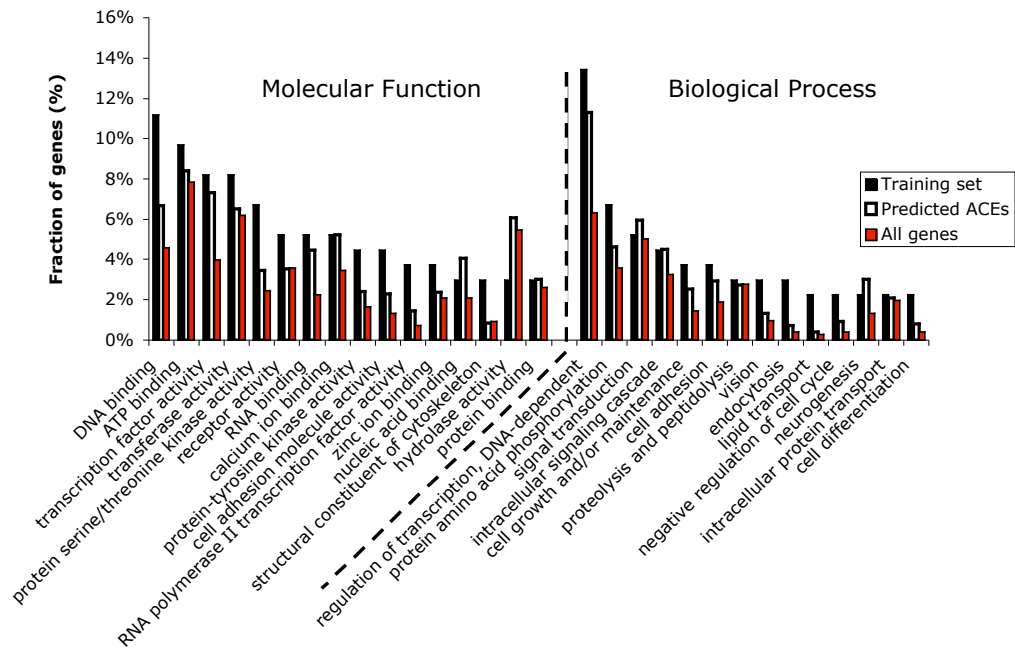

Supplement: pnas_102_8_2850__8.pdf [file pnas_102_8_2850__8.pdf]
